# Supplementary material for: A scalable and unbiased discordance metric with H+
Source: PubMed Central journal article supplement (PMC10724244; doi:10.1093/biostatistics/kxac035), 2022-09-05
Supplement: kxac035_supplementarey_data.pdf [file kxac035_supplementarey_data.pdf]

### A scalable and unbiased discordance metric with $H_+$

Nathan Dyjack, Daniel N. Baker, Vladimir Braverman, Ben Langmead, Stephanie C. Hicks\*

\*Correspondence to [shicks19@jhu.edu](mailto:shicks19@jhu.edu)

#### Contents

1. **Supplemental Notes.**
2. **Supplemental Figures S1-S2.**
3. **Supplemental Table S1-S2.**

## Supplemental Notes

### Note 1

Assume we have a set of  $n$  unique observations. For a given dissimilarity matrix  $D$  (e.g. Euclidean distance):

$$D = \begin{bmatrix} d_{11} & d_{12} & \cdots & d_{1n} \\ & d_{22} & \cdots & d_{2n} \\ & & \ddots & \vdots \\ & & & d_{nn} \end{bmatrix}$$

and fixed set of predicted cluster labels  $L$ , we can generate an adjacency matrix that tells us whether each observation has the same label (i.e., falls in the same cluster)

$$A = \begin{bmatrix} a_{11} & a_{12} & \cdots & a_{1n} \\ & a_{22} & \cdots & a_{2n} \\ & & \ddots & \vdots \\ & & & a_{nn} \end{bmatrix} \quad a_{ij} = \begin{cases} 1 & \text{if } l_i = l_j \\ 0 & \text{otherwise} \end{cases}$$

Using  $d_{ij}$  and  $a_{ij}$  for each  $i, j$  pairs of observations, we can then rewrite  $s$  in Equation 1 in terms of  $A, D$ . Let  $D_W = \{d_{ij} : a_{ij} = 1; i = 2, \dots, n, j < i\}$ , that is, looping over the upper-triangular elements of  $A, D$  such that  $a_{ij} = 1$  to select pairs which correspond to observations that are within the same cluster. We similarly define  $D_B = \{d_{uv} : a_{uv} = 0; u = 2, \dots, n, v < u\}$ , the dissimilarity pairs corresponding to observations with different cluster labels.

$$\begin{aligned} s &= \sum_{d_{ij} \in D_W} \sum_{d_{uv} \in D_B} 1_{[d_{ij} > d_{uv}]} \\ &= \sum_{i=2}^n \sum_{j < i} 1_{[a_{ij}=1]} \sum_{u=2}^n \sum_{v < u} 1_{[a_{uv}=0]} 1_{[d_{ij} > d_{uv}]} \end{aligned}$$

The total number of distances in each of these sets is  $|D_W|$  and  $|D_B|$ , respectively. As each upper triangular entry of  $A$  is binary (every distance is either between or within-cluster), we know that  $|D_W| + |D_B| = N_d$ . We can define  $\alpha$  where  $\alpha \in (0, 1)$  as the portion of total distances  $N_d$  that are within-cluster distances (or  $d_{ij} \in D_W$ ). In this way, we can define  $|D_W| = \alpha N_d$ , and similarly,  $|D_B| = (1 - \alpha)N_d$ .

Conditional on  $N_d$  and  $\alpha$ , the expected value of  $s$  is

$$\begin{aligned} E[s] &= E \left[ \sum_{i=2}^n \sum_{j < i} 1_{[a_{ij}=1]} \sum_{u=2}^n \sum_{v < u} 1_{[a_{uv}=0]} 1_{[d_{ij} > d_{uv}]} \right] \\ &= E \left[ \sum_{i=2}^n \sum_{j < i} 1_{[a_{ij}=1]} \right] E \left[ \sum_{u=2}^n \sum_{v < u} 1_{[a_{uv}=0]} \right] E \left[ 1_{[d_{ij} > d_{uv}]} \right] \\ &= N_d P(a_{ij} = 1) N_d P(a_{uv} = 0) P(d_{ij} > d_{uv}) \\ &= \alpha(1 - \alpha) N_d^2 P(d_{ij} > d_{uv}) \end{aligned}$$

where  $P(d_{ij} > d_{uv})$  is the probability a within-cluster distance  $d_{ij} \in D_w$  is greater than a between-cluster distance  $d_{uv} \in D_B$ .

Then, the expectation of  $G_+$  is:

$$\begin{aligned} E[G_+] &= \frac{E[s]}{N_d(N_d - 1)/2} \\ &= \frac{\alpha(1 - \alpha) N_d^2 P(d_{ij} > d_{uv})}{N_d(N_d - 1)/2} \\ &= \frac{N_d}{N_d - 1} 2\alpha(1 - \alpha) P(d_{ij} > d_{uv}) \end{aligned}$$

**Note 2**

We can also consider convergence in terms of the sum  $s$  by considering  $q(D_W)$  and  $q(D_B)$  as sampling without replacement from  $D_W$  and  $D_B$ . We denote  $s_e$  the estimated form of the sum  $s$  Equation 2, that is

$$s_e = \sum_{d_{ij} \in q(D_W)} \sum_{d_{uv} \in q(D_B)} 1(d_{ij} > d_{uv}) \quad (1)$$

While  $|q(D_W)| \leq |D_W|$  and  $|q(D_B)| \leq |D_B|$ , we have that  $s_e + s_n = s$  where  $s_n$  represents portions of the summand  $s$  that have not yet been counted in  $s_e$ . This allows us to consider the convergence of an estimated  $H_e$  to the true  $H_e$  in terms of the decomposition  $s_e = s - s_n$

$$H_+ - H_e = \frac{s}{|D_W||D_B|} - \frac{s_e}{|q(D_W)||q(D_B)|} = \frac{s}{|D_W||D_B|} - \frac{s}{|q(D_W)||q(D_B)|} + \frac{s_n}{|q(D_W)||q(D_B)|} \quad (2)$$

The denominators of the second and third term approach  $|D_W||D_B|$  as the number of distances sampled increases. The second term seems to approach  $H_+$  at  $1/|q(D_W)||q(D_B)|$ . The third term approaches zero as  $|q(D_W)||q(D_B)| \rightarrow |D_W||D_B|$  and  $s_n$  decreases with each iteration in a factor bounded by  $|q(D_W)||q(D_B)|$ . This argument provides an intuitive argument that the convergence is achieved simply by increasing  $|q(D_W)|$  and  $|q(D_B)|$ .

## Supplemental Figures

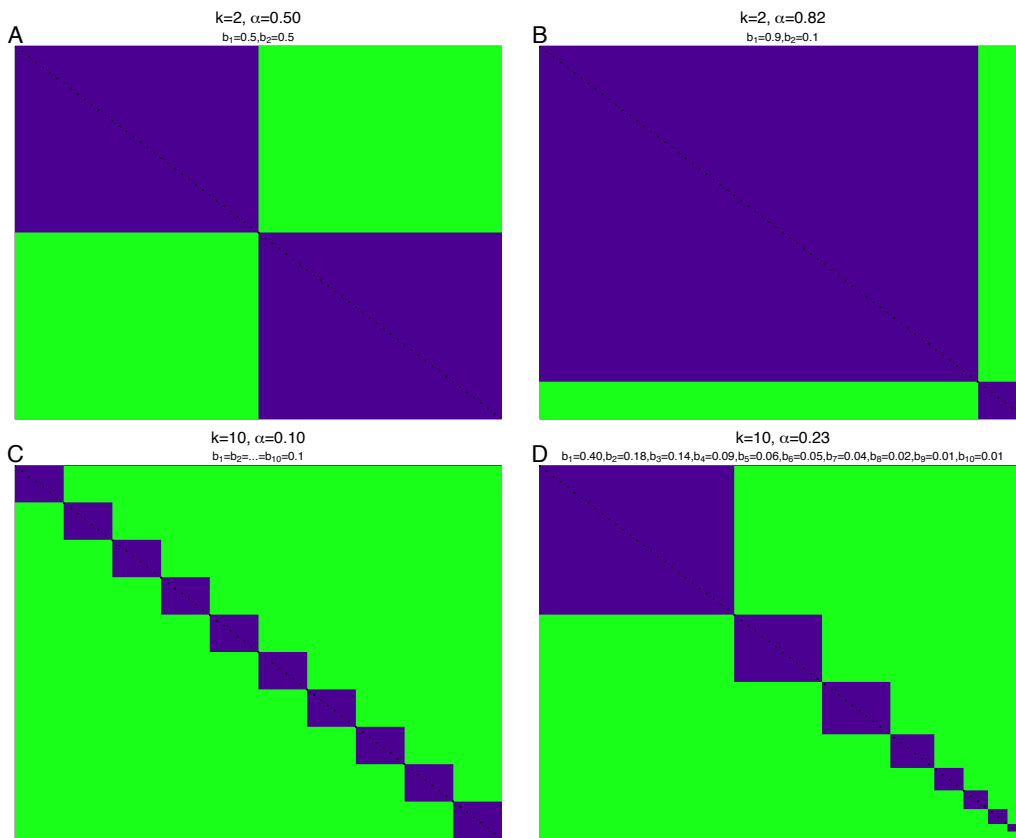

**Supplementary Figure S1.** An illustration of the relationship between group (or class) balance and  $\alpha$ . Recall that  $\alpha$  is the portion of total distances  $N_d$  that are within-cluster distances, or  $|D_W| = \alpha N_d$ , which can be seen most easily by using a heatmap of an adjacency matrix for (A-B) two or (C-D) ten groups for (A,C) balanced or (B,D) imbalanced groups. Unique pairs of observations are given on the upper-triangular portion of each adjacency matrix. Within-cluster pairs are given in blue, and between-cluster pairs are given in green. In other words,  $\alpha$  is given by the blue proportion of each adjacency matrix. The group balance (and corresponding  $\alpha$ ) is (A)  $b_1, b_2 = 0.5$  ( $\alpha = 0.50$ ), (B)  $b_1 = 0.9, b_2 = 0.1$  ( $\alpha = 0.82$ ), (C)  $b_1, \dots, b_{10} = 0.1$  ( $\alpha = 0.10$ ), and (D)  $b_1, b_2, \dots, b_{10} = 0.40, 0.18, 0.14, 0.09, 0.06, 0.05, 0.04, 0.02, 0.01, 0.01$  ( $\alpha = 0.23$ ).

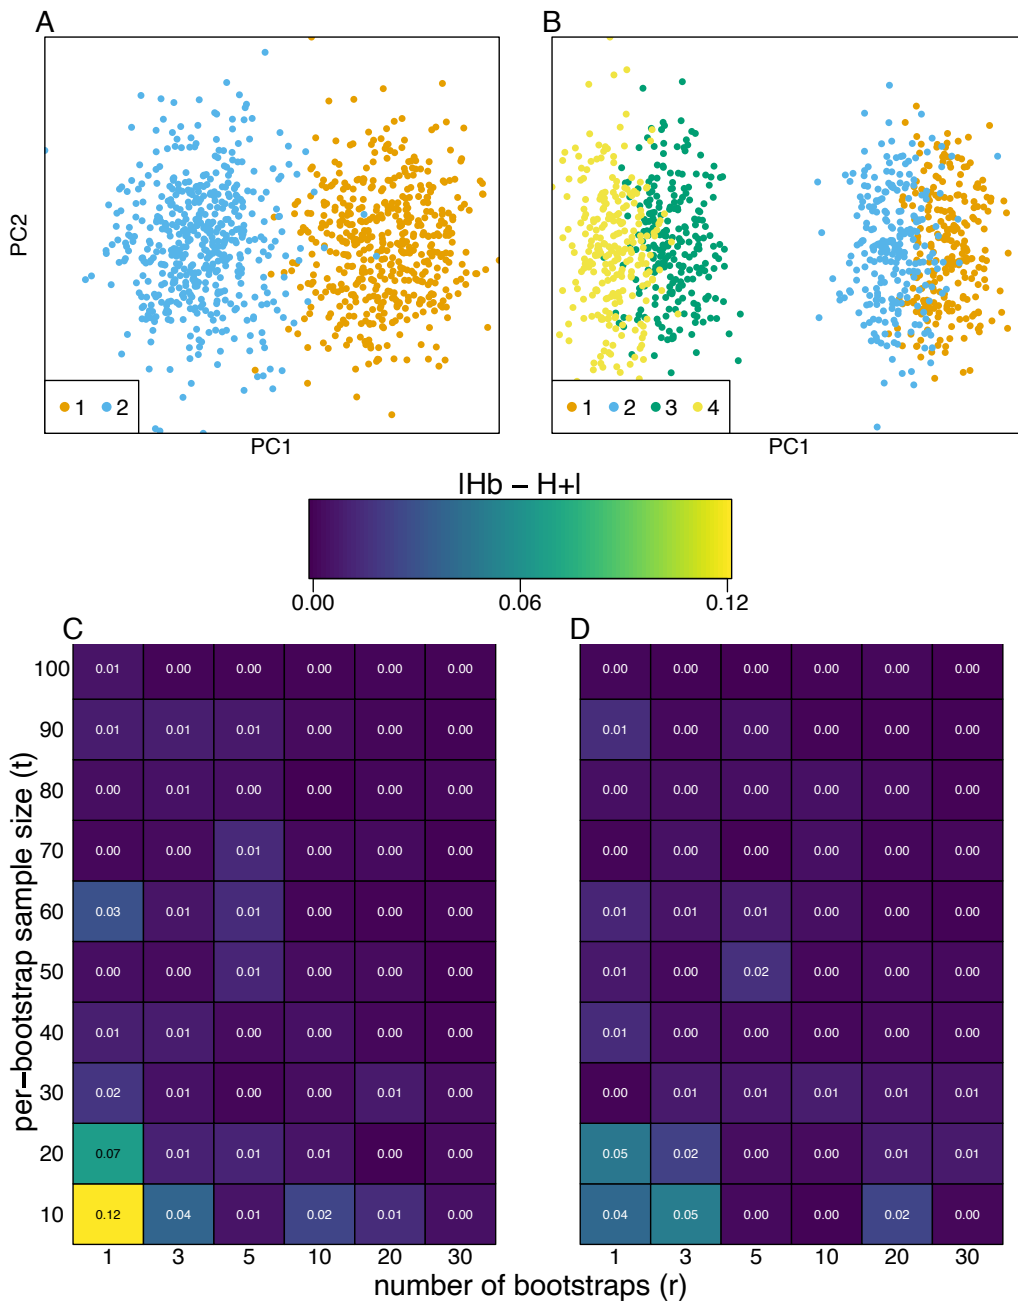

**Supplementary Figure S2. Accuracy of the bootstrap  $H_+$  estimation procedure for two simulated datasets.** Two datasets were simulated using 1000 observations, 500 features with two ( $N(-0.05, 0.25), N(0.05, 0.25)$ ) (A) and four ( $N(-0.15, 0.25), N(-0.10, 0.25), N(0.10, 0.25), N(0.15, 0.25)$ ) (B) balanced classes. The difference absolute difference between  $H_+$  (estimated using HPE with  $p = 10001$ ) and the bootstrap estimate  $H_b$  for  $r$  replications (bootstraps) using  $s$  samples per bootstrap. For these simulations, sampling as little as 1% ( $t = 10$ ) of the observations over  $r = 30$  bootstraps provides an accurate estimate for  $H_+$ .

## Supplemental Tables

**Supplementary Table S1. Performance evaluation for elapsed time as reported in Figure 3.** We report the elapsed time (seconds) for the individual components including calculating the dissimilarity matrix (dis), the adjacency matrix (adj),  $s$  (sum), HPE estimate using the `hpe()` function in the `fasthplus` R package, and HPB estimate using the `hpb()` function in the `fasthplus` R package for increasing sizes of datasets with  $n = 100, 500, 1,000,$  and  $3,000$  observations and 500 features. All observations were simulated from  $N_{500}(0,1)$  and then split evenly in two groups. The `hpb` procedure used  $r = 0.05 \times n$  with  $t = 30$ , and the `hpe` procedure used  $p = 1001$  with the grid search algorithm.

| obs | 100  | 500   | 1000 | 3000  |
|-----|------|-------|------|-------|
| dis | 0.01 | 0.22  | 3.00 | 36.71 |
| adj | 0.00 | 0.01  | 0.08 | 0.44  |
| sum | 0.08 | 59.68 | NA   | NA    |
| hpe | 0.12 | 0.15  | 0.28 | 1.86  |
| hpb | 0.01 | 0.05  | 0.20 | 5.74  |

**Supplementary Table S2. Performance evaluation of  $H_+$  using known observation labels and several dissimilarity methods.** We report estimated  $H_+$  for fixed (experimentally validated *a priori*) labels of 902 scRNA-seq observations. For each of the 5 dissimilarity methods  $H_+$  was estimated using the validated labels, and the `hpe` procedure with  $p = 10001$ .

| Dissimilarity | $H_+$ |
|---------------|-------|
| Euclidean     | 0.022 |
| Maximum       | 0.124 |
| Manhattan     | 0.021 |
| Canberra      | 0.047 |
| Binary        | 0.078 |
